# Supplementary material for: Fenamic acid crystal with two asymmetric units (Z′ = 2): why Z′ = 2 rather than Z′ = 1
Source: Royal Society of Chemistry journal article supplement (doi:10.1039/c6ce02646j), 2017-01-01
Supplement: c6ce02646j1.pdf [file c6ce02646j1.pdf]

## Supporting Information

### **Fenamic acid crystal with two asymmetric units ( $Z' = 2$ ): why $Z' = 2$ rather than $Z' = 1$ ?**

*Fan Yang,<sup>a</sup> Chao-Xian Yan,<sup>a</sup> Xing Yang,<sup>a</sup> Da-Gang Zhou,<sup>a</sup> Pan-Pan Zhou\*<sup>a</sup>*

*<sup>a</sup>State Key Laboratory of Applied Organic Chemistry, Key Laboratory of Nonferrous Metal  
Chemistry and Resources Utilization of Gansu Province, College of Chemistry and Chemical  
Engineering, Lanzhou University, 222 South Tianshui Road, 730000, Lanzhou, P. R. China.*

*\*E-mail: zhoupp@lzu.edu.cn*

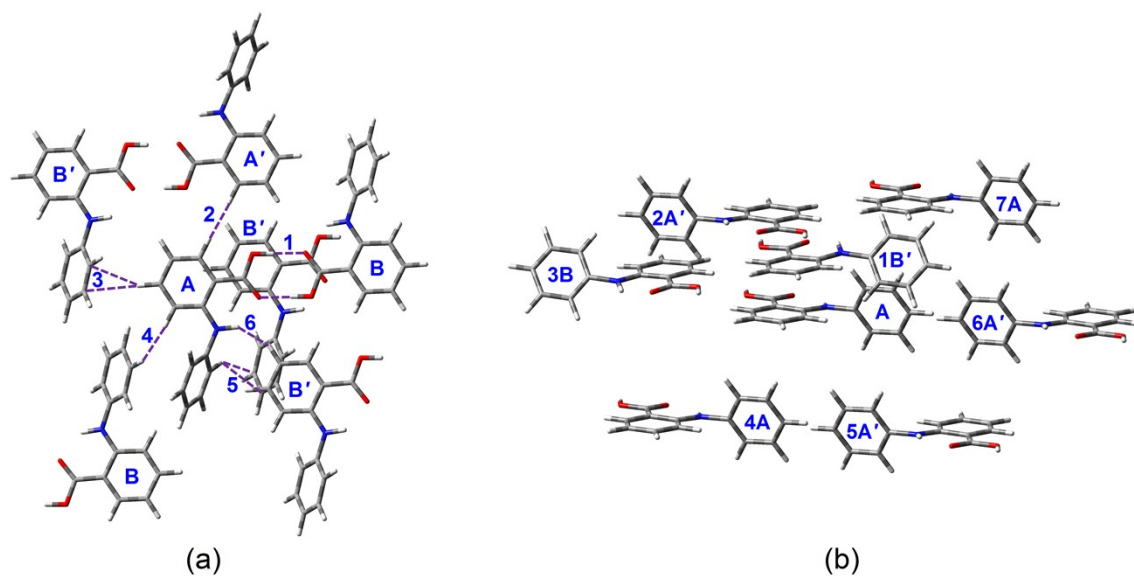

**Fig. S1** Six FA molecules interacting with conformer **A** through close contacts (a); seven FA molecules interacting with conformer **A** through  $\pi$ - $\pi$  interactions (b). The number represents the different complex formed between molecules.

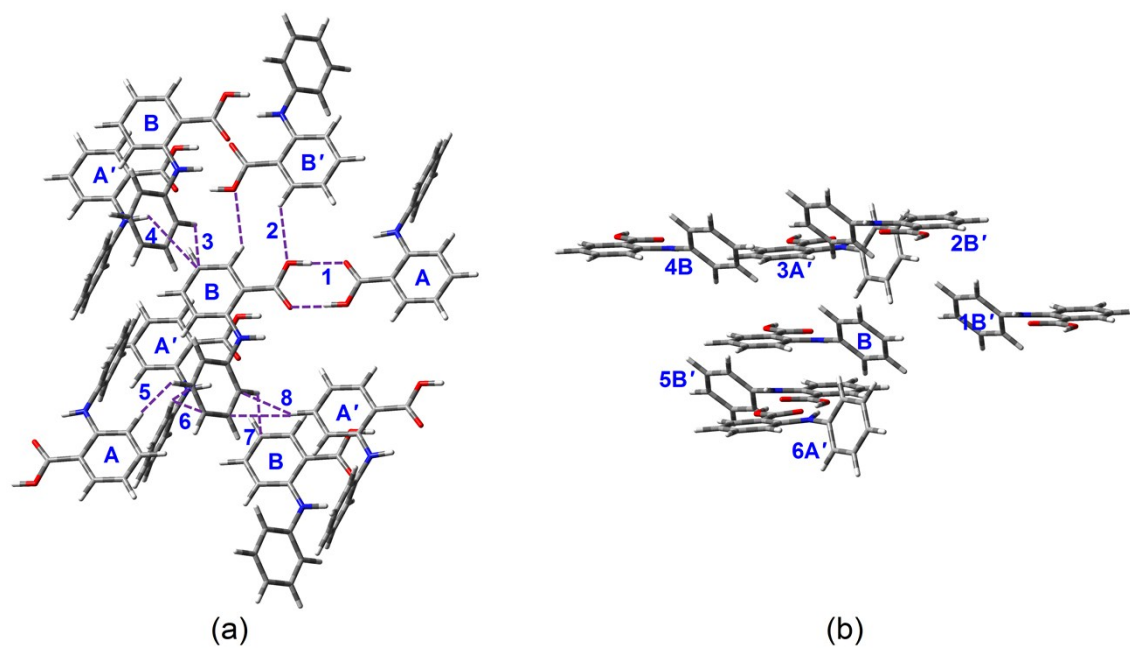

**Fig. S2** Eight FA molecules interacting with conformer **B** through close contacts (a); six FA molecules interacting with conformer **B** through  $\pi$ - $\pi$  interactions (b). The number represents the different complex formed between molecules.

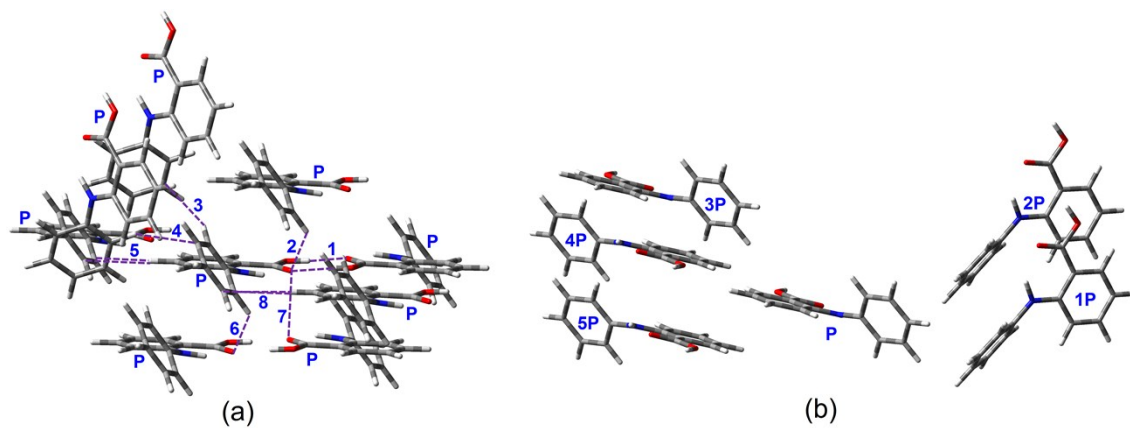

**Fig. S3** Eight FA molecules interacting with conformer **P** through close contacts (a); five FA molecules interacting with conformer **P** through  $\pi$ - $\pi$  interactions (b). The number represents the different complex formed between molecules.

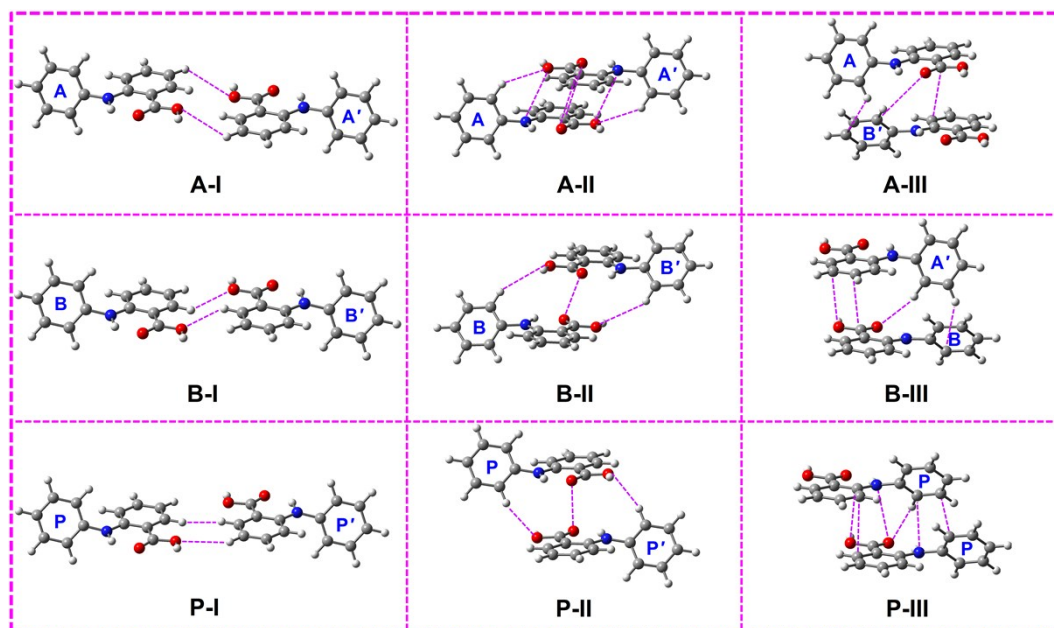

**Fig. S4** The molecular pairs (type 1) of the adjacent molecules directly interacting with the carboxyl groups of **A**, **B** and **P** in the partly optimized ( $Z'=2$ ) and predicted ( $Z'=1$ ) FA crystals and the interacting atoms at BCPs listed in Table S2.

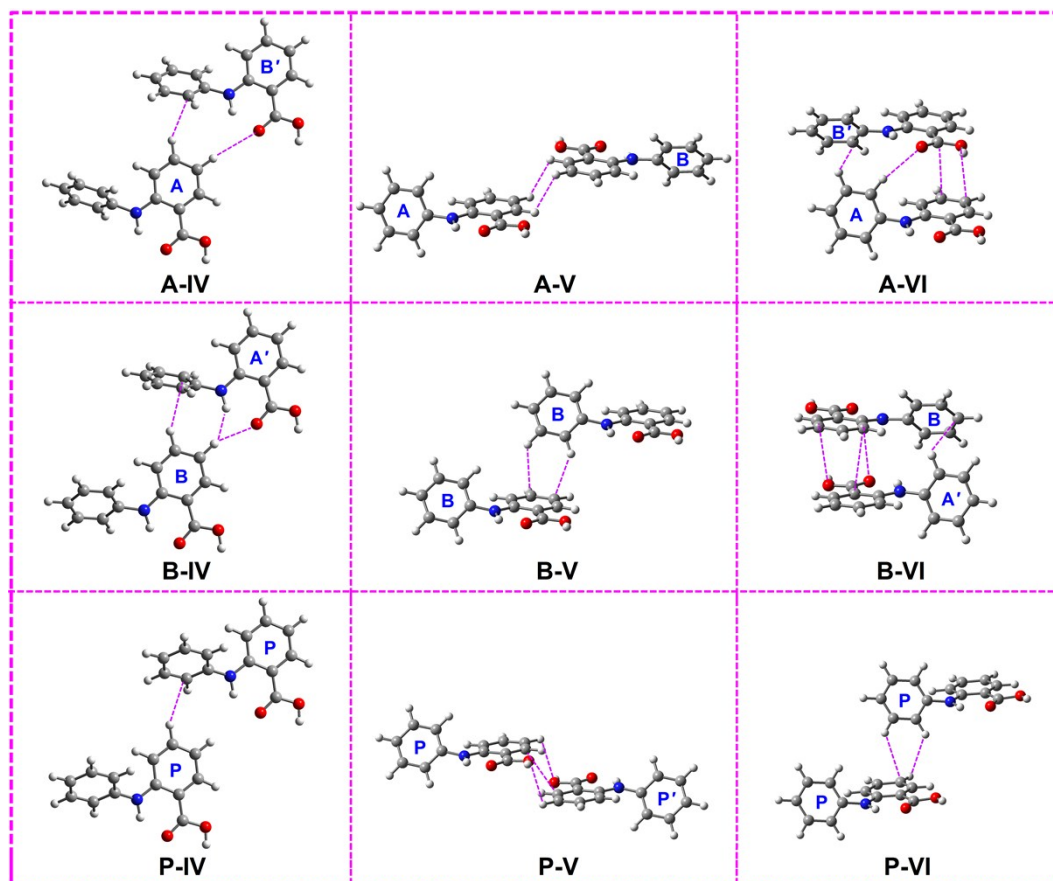

**Fig. S5** The molecular pairs (type 2) of the adjacent molecules directly interacting with the carboxyl groups of **A**, **B** and **P** in the partly optimized ( $Z'=2$ ) and predicted ( $Z'=1$ ) FA crystals and the interacting atoms at BCPs listed in Table S3.

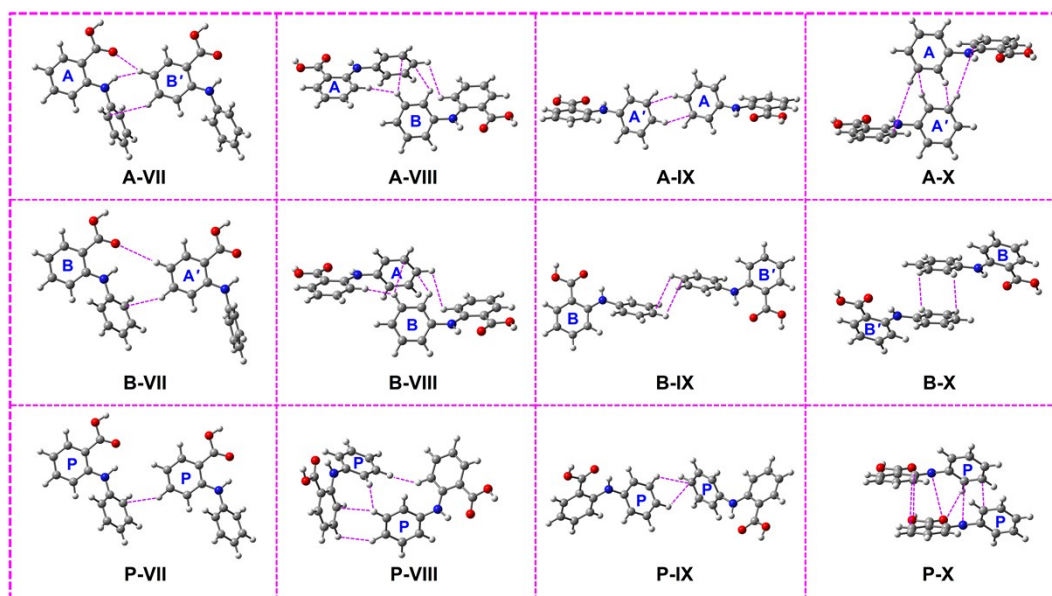

**Fig. S6** The molecular pairs (type 3) of the adjacent molecules directly interacting with the carboxyl groups of **A**, **B** and **P** in the partly optimized ( $Z'=2$ ) and predicted ( $Z'=1$ ) FA crystals and the interacting atoms at BCPs listed in Table S4.

**Table S1** Crystallographic data for the experimental observed, partly optimized and predicted FA crystals.

|                                     | Exp FA crystal                                  | Partly optimized crystal                        | #1FA_22                                         |
|-------------------------------------|-------------------------------------------------|-------------------------------------------------|-------------------------------------------------|
| Formula                             | C <sub>13</sub> H <sub>11</sub> NO <sub>2</sub> | C <sub>13</sub> H <sub>11</sub> NO <sub>2</sub> | C <sub>13</sub> H <sub>11</sub> NO <sub>2</sub> |
| Molecular weight/gmol <sup>-1</sup> | 213.23                                          | 213.23                                          | 213.23                                          |
| Space group                         | <i>P</i> $\bar{1}$                              | <i>P</i> 1                                      | <i>P</i> 2 <sub>1</sub> / <i>c</i>              |
| <i>a</i> /Å                         | 8.0995(5)                                       | 8.09950                                         | 8.7                                             |
| <i>b</i> /Å                         | 9.8268(6)                                       | 9.82680                                         | 4.7                                             |
| <i>c</i> /Å                         | 14.0593(11)                                     | 14.05929                                        | 27.2                                            |
| <i>α</i> <sup>°</sup>               | 85.96(6)                                        | 85.96                                           | 90                                              |
| <i>β</i> <sup>°</sup>               | 88.62(7)                                        | 88.62                                           | 73.9                                            |
| <i>γ</i> <sup>°</sup>               | 73.39(4)                                        | 73.39                                           | 90                                              |
| <i>Z, Z'</i>                        | 4, 2                                            | 4, 2                                            | 4, 1                                            |
| <i>V</i> /Å <sup>3</sup>            | 1069.64                                         | 1069.64                                         | 1058.84                                         |



**Table S2** Intermolecular bond critical points (BCPs), electron density ( $\rho$ , in a.u.) and its Laplacian value ( $\nabla^2\rho$ , in a.u.), the electronic potential energy density ( $V$ , in a.u.), the electronic kinetic energy density ( $G$ , in a.u.) and the electronic energy density ( $H$ , in a.u.) at the BCPs of the complexes involving conformer **A**.<sup>a</sup>

|                       | BCP                                   | $\rho$  | $\nabla^2\rho$ | $V$      | $G$     | $H$      |
|-----------------------|---------------------------------------|---------|----------------|----------|---------|----------|
| <b>A</b> ... <b>B</b> | H15 <sup>A</sup> ...O16 <sup>B</sup>  | 0.04601 | 0.12909        | -0.04218 | 0.03723 | -0.00495 |
|                       | O16 <sup>A</sup> ...H15 <sup>B</sup>  | 0.04666 | 0.12822        | -0.04273 | 0.03739 | -0.00534 |
| <b>A-I</b>            | H3 <sup>A</sup> ...O15 <sup>A'</sup>  | 0.00208 | 0.00889        | -0.00121 | 0.00171 | 0.00051  |
|                       | O15 <sup>A</sup> ...H3 <sup>A'</sup>  | 0.00208 | 0.00889        | -0.00121 | 0.00171 | 0.00051  |
| <b>A-II</b>           | O15 <sup>A</sup> ...H9 <sup>A'</sup>  | 0.00149 | 0.00674        | -0.00076 | 0.00122 | 0.00046  |
|                       | O15 <sup>A</sup> ...N7 <sup>A'</sup>  | 0.00239 | 0.00895        | -0.00132 | 0.00178 | 0.00046  |
|                       | N7 <sup>A</sup> ...O15 <sup>A'</sup>  | 0.00239 | 0.00895        | -0.00132 | 0.00178 | 0.00046  |
|                       | H9 <sup>A</sup> ...O15 <sup>A'</sup>  | 0.00149 | 0.00674        | -0.00076 | 0.00122 | 0.00046  |
|                       | O16 <sup>A</sup> ...C1 <sup>A'</sup>  | 0.00339 | 0.01089        | -0.00157 | 0.00215 | 0.00058  |
|                       | C1 <sup>A</sup> ...O16 <sup>A'</sup>  | 0.00339 | 0.01089        | -0.00157 | 0.00215 | 0.00058  |
|                       | H13 <sup>A</sup> ...C11 <sup>B'</sup> | 0.00644 | 0.02004        | -0.00331 | 0.00416 | 0.00085  |
| <b>A-III</b>          | O16 <sup>A</sup> ...C9 <sup>B'</sup>  | 0.00351 | 0.01187        | -0.00184 | 0.00241 | 0.00057  |
|                       | C1 <sup>A</sup> ...C5 <sup>B'</sup>   | 0.00542 | 0.01417        | -0.00214 | 0.00284 | 0.00070  |
|                       | H3 <sup>A</sup> ...O16 <sup>B'</sup>  | 0.00148 | 0.00663        | -0.00078 | 0.00122 | 0.00044  |
| <b>A-IV</b>           | H4 <sup>A</sup> ...C13 <sup>B'</sup>  | 0.00729 | 0.02369        | -0.00371 | 0.00482 | 0.00111  |
|                       | H2 <sup>A</sup> ...H3 <sup>B</sup>    | 0.00456 | 0.01421        | -0.00214 | 0.00285 | 0.00071  |
| <b>A-V</b>            | H3 <sup>A</sup> ...H2 <sup>B</sup>    | 0.00474 | 0.01473        | -0.00226 | 0.00297 | 0.00071  |
|                       | H9 <sup>A</sup> ...O16 <sup>B'</sup>  | 0.00471 | 0.01616        | -0.00278 | 0.00341 | 0.00062  |
| <b>A-VI</b>           | C4 <sup>A</sup> ...C14 <sup>B'</sup>  | 0.00394 | 0.01090        | -0.00160 | 0.00216 | 0.00056  |
|                       | C3 <sup>A</sup> ...O15 <sup>B'</sup>  | 0.00440 | 0.01380        | -0.00226 | 0.00286 | 0.00060  |
|                       | H10 <sup>A</sup> ...C13 <sup>B'</sup> | 0.00478 | 0.01413        | -0.00233 | 0.00293 | 0.00060  |
|                       | O16 <sup>A</sup> ...H3 <sup>B'</sup>  | 0.00471 | 0.01655        | -0.00285 | 0.00349 | 0.00064  |
| <b>A-VII</b>          | H7 <sup>A</sup> ...H3 <sup>B'</sup>   | 0.00411 | 0.01484        | -0.00233 | 0.00302 | 0.00069  |
|                       | C9 <sup>A</sup> ...H4 <sup>B'</sup>   | 0.00430 | 0.01248        | -0.00202 | 0.00257 | 0.00055  |
|                       | H5 <sup>A</sup> ...H10 <sup>B</sup>   | 0.00686 | 0.02116        | -0.00370 | 0.00449 | 0.00079  |
| <b>A-VIII</b>         | C12 <sup>A</sup> ...H10 <sup>B</sup>  | 0.00459 | 0.01309        | -0.00216 | 0.00271 | 0.00055  |
|                       | C11 <sup>A</sup> ...H9 <sup>B</sup>   | 0.00496 | 0.01484        | -0.00219 | 0.00295 | 0.00076  |
|                       | H11 <sup>A</sup> ...H5 <sup>B</sup>   | 0.00312 | 0.01012        | -0.00146 | 0.00199 | 0.00053  |
|                       | C12 <sup>A</sup> ...H11 <sup>A'</sup> | 0.00445 | 0.01385        | -0.00190 | 0.00268 | 0.00078  |
| <b>A-IX</b>           | H11 <sup>A</sup> ...C12 <sup>A'</sup> | 0.00445 | 0.01384        | -0.00190 | 0.00268 | 0.00078  |
|                       | H12 <sup>A</sup> ...C9 <sup>A'</sup>  | 0.00077 | 0.00254        | -0.00026 | 0.00045 | 0.00019  |
| <b>A-X</b>            | C12 <sup>A</sup> ...H13 <sup>A'</sup> | 0.00267 | 0.00796        | -0.00108 | 0.00153 | 0.00045  |
|                       | H13 <sup>A</sup> ...C12 <sup>A'</sup> | 0.00267 | 0.00796        | -0.00108 | 0.00153 | 0.00045  |
|                       | C5 <sup>A</sup> ...H12 <sup>A'</sup>  | 0.00078 | 0.00254        | -0.00026 | 0.00045 | 0.00019  |
|                       |                                       |         |                |          |         |          |

<sup>a</sup> The atom numbering of the conformer in Fig. 1 is used here.

**Table S3** Intermolecular bond critical points (BCPs), electron density ( $\rho$ , in a.u.) and its Laplacian value ( $\nabla^2\rho$ , in a.u.), the electronic potential energy density ( $V$ , in a.u.), the electronic kinetic energy density ( $G$ , in a.u.) and the electronic energy density ( $H$ , in a.u.) at the BCPs of the complexes involving conformer **B**.<sup>a</sup>

|               | BCP                                   | $\rho$  | $\nabla^2\rho$ | $V$      | $G$     | $H$     |
|---------------|---------------------------------------|---------|----------------|----------|---------|---------|
| <b>B-I</b>    | O15 <sup>B</sup> ...H2 <sup>B'</sup>  | 0.00610 | 0.02064        | -0.00385 | 0.00451 | 0.00065 |
|               | H2 <sup>B</sup> ...O15 <sup>B'</sup>  | 0.00610 | 0.02064        | -0.00385 | 0.00451 | 0.00065 |
| <b>B-II</b>   | O15 <sup>B</sup> ...H13 <sup>B'</sup> | 0.00132 | 0.00581        | -0.00062 | 0.00104 | 0.00042 |
|               | O16 <sup>B</sup> ...O16 <sup>B'</sup> | 0.00508 | 0.01936        | -0.00295 | 0.00389 | 0.00095 |
|               | H13 <sup>B</sup> ...O15 <sup>B'</sup> | 0.00131 | 0.00580        | -0.00062 | 0.00104 | 0.00042 |
| <b>B-III</b>  | O15 <sup>B</sup> ...C3 <sup>A'</sup>  | 0.00440 | 0.01380        | -0.00226 | 0.00286 | 0.00059 |
|               | C14 <sup>B</sup> ...C4 <sup>A'</sup>  | 0.00394 | 0.01090        | -0.00160 | 0.00216 | 0.00057 |
|               | O16 <sup>B</sup> ...H9 <sup>A'</sup>  | 0.00471 | 0.01615        | -0.00278 | 0.00341 | 0.00063 |
|               | C13 <sup>B</sup> ...H10 <sup>A'</sup> | 0.00479 | 0.01414        | -0.00233 | 0.00293 | 0.00060 |
| <b>B-IV</b>   | H3 <sup>B</sup> ...O16 <sup>A'</sup>  | 0.00471 | 0.01656        | -0.00285 | 0.00350 | 0.00064 |
|               | H3 <sup>B</sup> ...H7 <sup>A'</sup>   | 0.00411 | 0.01484        | -0.00233 | 0.00302 | 0.00069 |
|               | H4 <sup>B</sup> ...C9 <sup>A'</sup>   | 0.00430 | 0.01248        | -0.00202 | 0.00257 | 0.00055 |
| <b>B-V</b>    | C4 <sup>B</sup> ...H12 <sup>B</sup>   | 0.00396 | 0.01108        | -0.00172 | 0.00225 | 0.00052 |
|               | C3 <sup>B</sup> ...H13 <sup>B</sup>   | 0.00582 | 0.01635        | -0.00259 | 0.00334 | 0.00075 |
| <b>B-VI</b>   | C2 <sup>B</sup> ...O15 <sup>A'</sup>  | 0.00351 | 0.01187        | -0.00184 | 0.00241 | 0.00056 |
|               | C5 <sup>B</sup> ...C1 <sup>A'</sup>   | 0.00542 | 0.01417        | -0.00214 | 0.00284 | 0.00070 |
|               | C6 <sup>B</sup> ...O16 <sup>A'</sup>  | 0.00500 | 0.01679        | -0.00259 | 0.00340 | 0.00080 |
|               | C11 <sup>B</sup> ...H13 <sup>A'</sup> | 0.00644 | 0.02004        | -0.00331 | 0.00416 | 0.00085 |
| <b>B-VII</b>  | O16 <sup>B</sup> ...H3 <sup>A'</sup>  | 0.00148 | 0.00663        | -0.00079 | 0.00122 | 0.00044 |
|               | C13 <sup>B</sup> ...H4 <sup>A'</sup>  | 0.00729 | 0.02370        | -0.00371 | 0.00482 | 0.00111 |
| <b>B-VIII</b> | H5 <sup>B</sup> ...H11 <sup>A</sup>   | 0.00312 | 0.01011        | -0.00145 | 0.00199 | 0.00054 |
|               | H9 <sup>B</sup> ...C11 <sup>A</sup>   | 0.00496 | 0.01485        | -0.00219 | 0.00295 | 0.00076 |
|               | H10 <sup>B</sup> ...C10 <sup>A</sup>  | 0.00459 | 0.01309        | -0.00216 | 0.00271 | 0.00056 |
|               | H10 <sup>B</sup> ...H5 <sup>A</sup>   | 0.00685 | 0.02115        | -0.00370 | 0.00450 | 0.00079 |
| <b>B-IX</b>   | H11 <sup>B</sup> ...C11 <sup>B'</sup> | 0.00385 | 0.01094        | -0.00157 | 0.00215 | 0.00058 |
|               | C11 <sup>B</sup> ...H11 <sup>B'</sup> | 0.00385 | 0.01094        | -0.00157 | 0.00215 | 0.00058 |
| <b>B-X</b>    | H10 <sup>B</sup> ...H9 <sup>B'</sup>  | 0.00447 | 0.01402        | -0.00205 | 0.00278 | 0.00073 |
|               | H9 <sup>B</sup> ...H10 <sup>B'</sup>  | 0.00447 | 0.01402        | -0.00205 | 0.00278 | 0.00073 |

<sup>a</sup> The atom numbering of the conformer in Fig. 1 is used here.

**Table S4** Intermolecular bond critical points (BCPs), electron density ( $\rho$ , in a.u.) and its Laplacian value ( $\nabla^2\rho$ , in a.u.), the electronic potential energy density ( $V$ , in a.u.), the electronic kinetic energy density ( $G$ , in a.u.) and the electronic energy density ( $H$ , in a.u.) at the BCPs of the complexes involving conformer **P**.<sup>a</sup>

|               | BCP                                   | $\rho(r)$ | $\nabla^2\rho(r)$ | $V$      | $G$     | $H$     |
|---------------|---------------------------------------|-----------|-------------------|----------|---------|---------|
| <b>P-I</b>    | O15 <sup>P</sup> ...H3 <sup>P'</sup>  | 0.00140   | 0.00657           | -0.00080 | 0.00122 | 0.00042 |
|               | H18 <sup>P</sup> ...H2 <sup>P'</sup>  | 0.00340   | 0.01139           | -0.00172 | 0.00228 | 0.00057 |
| <b>P-II</b>   | H13 <sup>P</sup> ...O15 <sup>P'</sup> | 0.00331   | 0.01235           | -0.00187 | 0.00248 | 0.00061 |
|               | O16 <sup>P</sup> ...O16 <sup>P'</sup> | 0.00761   | 0.02707           | -0.00538 | 0.00608 | 0.00069 |
|               | O15 <sup>P</sup> ...H13 <sup>P'</sup> | 0.00331   | 0.01235           | -0.00187 | 0.00248 | 0.00061 |
| <b>P-III</b>  | C9 <sup>P</sup> ...C12 <sup>P</sup>   | 0.00504   | 0.01328           | -0.00197 | 0.00265 | 0.00067 |
|               | N7 <sup>P</sup> ...C13 <sup>P</sup>   | 0.00475   | 0.01360           | -0.00216 | 0.00278 | 0.00062 |
|               | O16 <sup>P</sup> ...H13 <sup>P</sup>  | 0.00937   | 0.03217           | -0.00598 | 0.00701 | 0.00103 |
|               | O16 <sup>P</sup> ...N7 <sup>P</sup>   | 0.00437   | 0.01407           | -0.00244 | 0.00298 | 0.00054 |
|               | C2 <sup>P</sup> ...C5 <sup>P</sup>    | 0.00557   | 0.01507           | -0.00223 | 0.00300 | 0.00077 |
| <b>P-IV</b>   | O15 <sup>P</sup> ...C6 <sup>P</sup>   | 0.00511   | 0.01697           | -0.00276 | 0.00350 | 0.00074 |
|               | C13 <sup>P</sup> ...H4 <sup>P</sup>   | 0.00602   | 0.01780           | -0.00273 | 0.00359 | 0.00086 |
| <b>P-V</b>    | H3 <sup>P</sup> ...O15 <sup>P'</sup>  | 0.00291   | 0.01050           | -0.00150 | 0.00206 | 0.00056 |
|               | C2 <sup>P</sup> ...C2 <sup>P'</sup>   | 0.00532   | 0.01588           | -0.00224 | 0.00311 | 0.00086 |
|               | O15 <sup>P</sup> ...H3 <sup>P'</sup>  | 0.00291   | 0.01050           | -0.00150 | 0.00206 | 0.00056 |
| <b>P-VI</b>   | H3 <sup>P</sup> ...H13 <sup>P</sup>   | 0.00229   | 0.00810           | -0.00109 | 0.00156 | 0.00047 |
|               | C3 <sup>P</sup> ...H12 <sup>P</sup>   | 0.00277   | 0.00829           | -0.00117 | 0.00162 | 0.00045 |
| <b>P-VII</b>  | C13 <sup>P</sup> ...H4 <sup>P</sup>   | 0.00602   | 0.01779           | -0.00273 | 0.00359 | 0.00086 |
| <b>P-VIII</b> | H11 <sup>P</sup> ...H4 <sup>P</sup>   | 0.00433   | 0.01364           | -0.00212 | 0.00277 | 0.00064 |
|               | H10 <sup>P</sup> ...C5 <sup>P</sup>   | 0.00518   | 0.01389           | -0.00225 | 0.00286 | 0.00061 |
|               | H10 <sup>P</sup> ...H9 <sup>P</sup>   | 0.00559   | 0.01736           | -0.00272 | 0.00353 | 0.00081 |
|               | H5 <sup>P</sup> ...H10 <sup>P</sup>   | 0.00220   | 0.00787           | -0.00105 | 0.00151 | 0.00046 |
| <b>P-IX</b>   | C11 <sup>P</sup> ...H12 <sup>P</sup>  | 0.00495   | 0.01570           | -0.00236 | 0.00314 | 0.00078 |
|               | C11 <sup>P</sup> ...H11 <sup>P</sup>  | 0.00545   | 0.01515           | -0.00243 | 0.00311 | 0.00068 |
| <b>P-X</b>    | C9 <sup>P</sup> ...C12 <sup>P</sup>   | 0.00504   | 0.01328           | -0.00197 | 0.00265 | 0.00067 |
|               | N7 <sup>P</sup> ...C13 <sup>P</sup>   | 0.00475   | 0.01360           | -0.00216 | 0.00278 | 0.00062 |
|               | O16 <sup>P</sup> ...H13 <sup>P</sup>  | 0.00937   | 0.03217           | -0.00598 | 0.00701 | 0.00103 |
|               | O16 <sup>P</sup> ...N7 <sup>P</sup>   | 0.00437   | 0.01407           | -0.00244 | 0.00298 | 0.00054 |
|               | C2 <sup>P</sup> ...C5 <sup>P</sup>    | 0.00557   | 0.01506           | -0.00222 | 0.00300 | 0.00077 |
|               | O15 <sup>P</sup> ...C6 <sup>P</sup>   | 0.00512   | 0.01697           | -0.00276 | 0.00350 | 0.00074 |

<sup>a</sup> The atom numbering of the conformer in Fig. 1 is used here.
